# Supplementary material for: Multicomponent analysis of the tumour microenvironment reveals low CD8 T cell number, low stromal caveolin-1 and high tenascin-C and their combination as significant prognostic markers in non-small cell lung cancer
Source: PubMed Central journal article supplement (PMC5788597; doi:10.18632/oncotarget.18880), 2017-06-29
Supplement: oncotarget-09-1760-s001.pdf [file oncotarget-09-1760-s001.pdf]

## Multicomponent analysis of the tumour microenvironment reveals low CD8 T cell number, low stromal caveolin-1 and high tenascin-C and their combination as significant prognostic markers in non-small cell lung cancer

### SUPPLEMENTARY MATERIALS

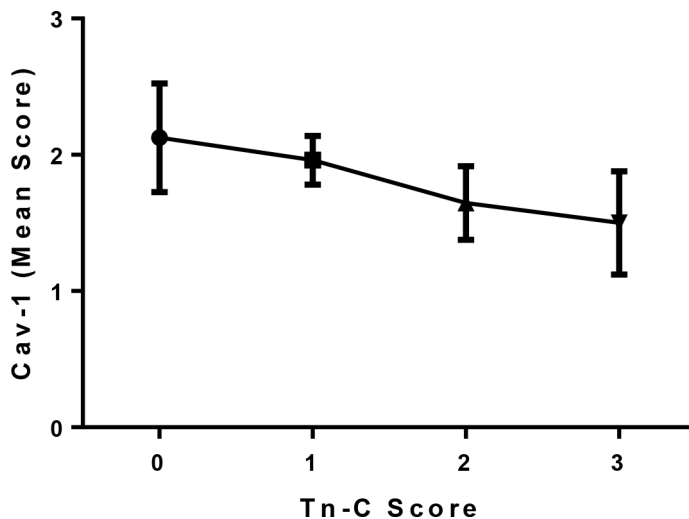

**Supplementary Figure 1: Inverse relationship between Cav-1 and Tn-C in the tumour stroma.** Samples were stained for Cav-1 and Tn-C as described in the main Materials and Methods. Sections were scored by three blinded assessors for the degree of stromal staining 0= 0-1%, 1= 2-10%, 2= 11-50%, 3=>50%. Error bars represent standard errors of the mean.

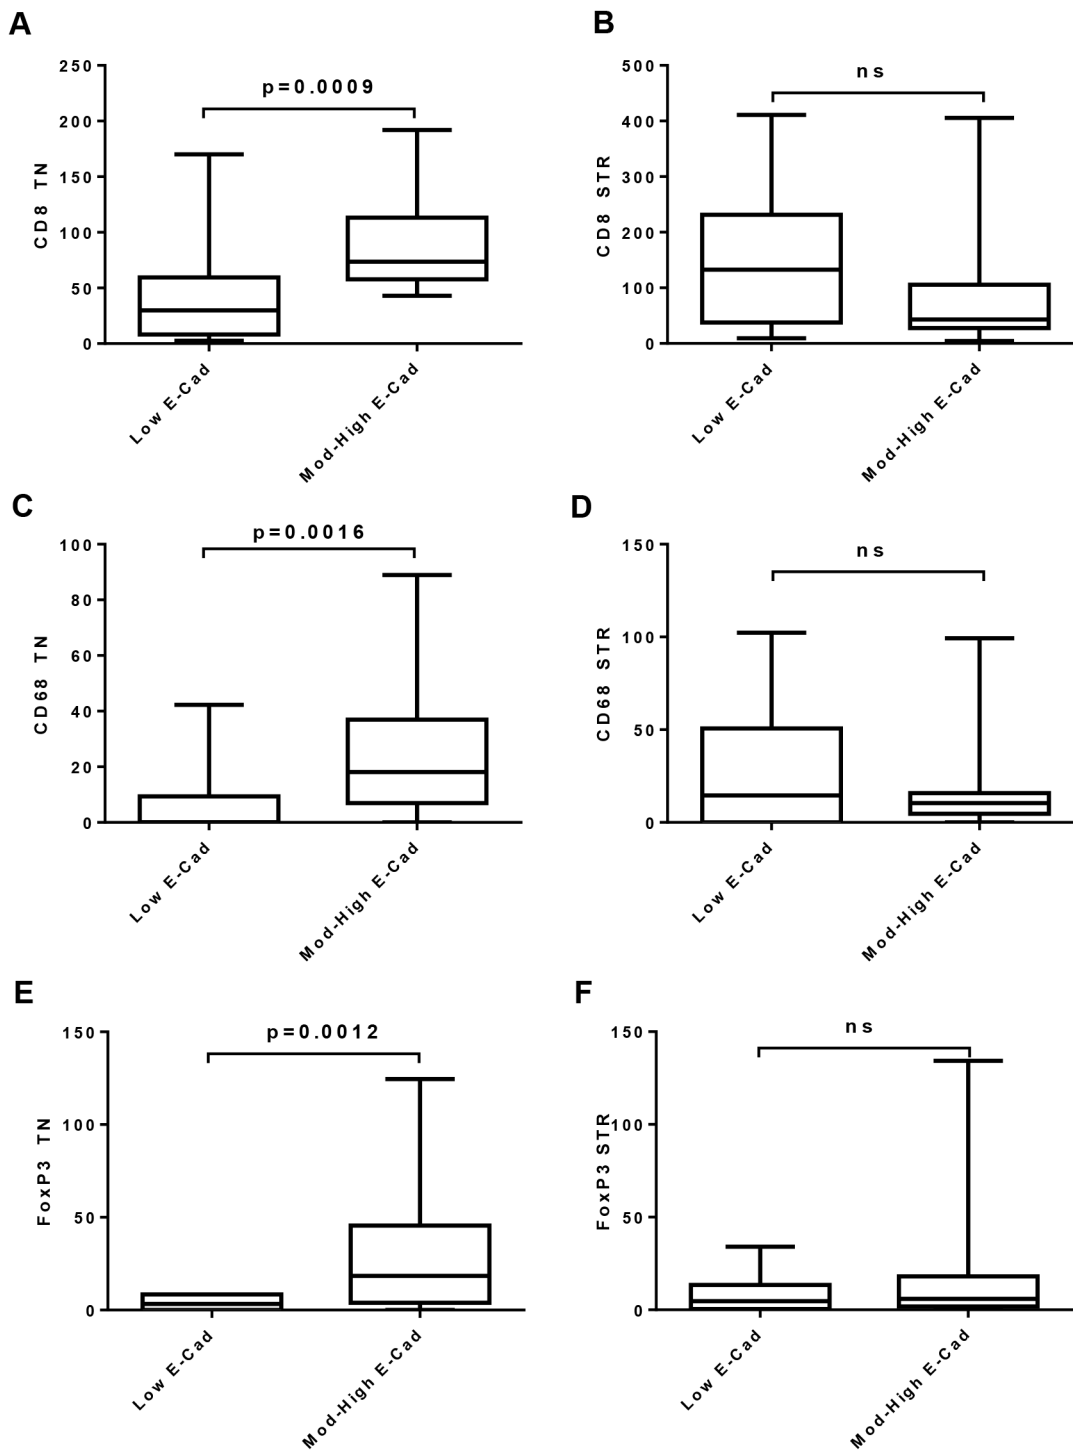

**Supplementary Figure 2: Frequency of immune infiltrate in the tumour nest but not the tumour stroma correlates with expression of E-Cadherin on tumour cells.** Frequency of immune infiltrate in tumours with low E-cadherin (H-Score) compared with those with moderate or high E-cadherin (medium or high H-Score) for: (A & B), CD8 T cells; (C & D), CD68+ macrophages; (D & E), FoxP3+ T-regulatory cells in tumour nest (TN) (A, C, E) or stroma (STR) (B, D, F). Box and whisker plots show median (central line) 25<sup>th</sup>-75<sup>th</sup> percentile (box) and min to max (whiskers). Significance of Mann-Whitney unpaired non-parametric T-test are shown.
